# Supplementary material for: Aetiology and risks factors associated with the fatal outcomes of childhood pneumonia among hospitalised children in the Philippines from 2008 to 2016: a case series study
Source: PubMed Central journal article supplement — BMJ Open. 2019 Mar 30;9(3):e026895. doi: 10.1136/bmjopen-2018-026895 (PMC6475207; doi:10.1136/bmjopen-2018-026895), 2019-03-30
Supplement: bmjopen-2018-026895supp001.pdf [file bmjopen-2018-026895supp001.pdf]

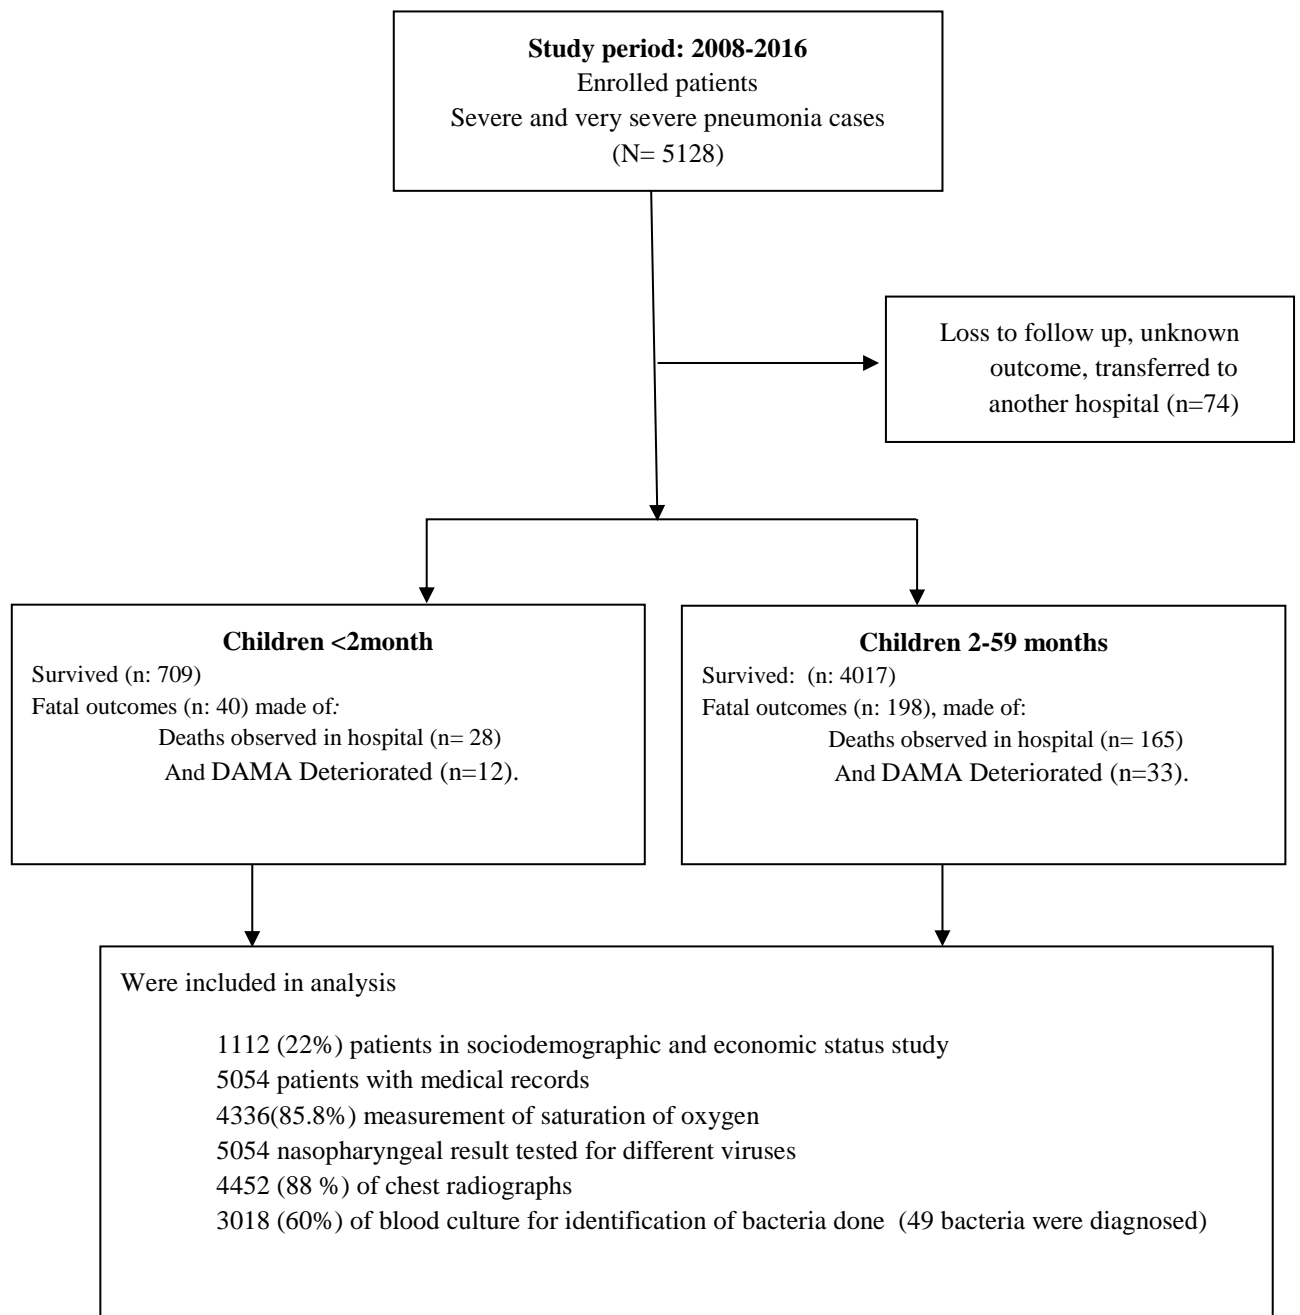

EVRMC, Eastern Visayas Regional Medical Center; ONP, Ospital NG Palawan, Eastern Visayas Regional Medical Center (EVRMC); DAMA, discharged against medical advice

**Supplement Figure 1 study profile.**
