# Supplementary material for: Aetiology and risks factors associated with the fatal outcomes of childhood pneumonia among hospitalised children in the Philippines from 2008 to 2016: a case series study
Source: PubMed Central journal article supplement — BMJ Open. 2019 Mar 30;9(3):e026895. doi: 10.1136/bmjopen-2018-026895 (PMC6475207; doi:10.1136/bmjopen-2018-026895), 2019-03-30
Supplement: bmjopen-2018-026895supp002.pdf [file bmjopen-2018-026895supp002.pdf]

**Supplement Table 1** Demographic, socio-economic, and environmental characteristics of children hospitalised with severe pneumonia, stratified by age group and outcome

|                                 | <u>Children &lt;2 months</u> |              |            |         | <u>Children 2–59 months</u> |               |            |         |
|---------------------------------|------------------------------|--------------|------------|---------|-----------------------------|---------------|------------|---------|
|                                 | Survived<br>n=709            | Died<br>n=40 | CFR<br>5.3 | p-value | Survived<br>n=4107          | Died<br>n=198 | CRF<br>4.6 | p-value |
| <b>Age group</b>                |                              |              |            |         |                             |               |            |         |
| <b>Less than 1 month</b>        | 286 (40.3)                   | 17 (42.5)    | 5.6        | 0.860   |                             |               |            | <0.001  |
| <b>1 month</b>                  | 423 (59.7)                   | 23 (57.5)    | 5.2        |         |                             |               |            |         |
| <b>2-5 months</b>               |                              |              |            |         | 1011 (25.2)                 | 76 (38.4)     | 7.0        |         |
| <b>6-11months</b>               |                              |              |            |         | 1064 (25.9)                 | 50 (25.3)     | 4.5        |         |
| <b>12-35 months</b>             |                              |              |            |         | 1677 (40.8)                 | 59 (29.8)     | 3.4        |         |
| <b>36-59 months</b>             |                              |              |            |         | 355 (8.6)                   | 13 (6.7)      | 3.5        |         |
| <b>Gender</b>                   |                              |              |            |         |                             |               |            |         |
| <b>Female</b>                   | 285 (40.2)                   | 17 (42.5)    | 5.6        | 0.900   | 1786 (43.5)                 | 90(45.5)      | 4.8        | 0.490   |
| <b>Male</b>                     | 424 (59.8)                   | 23 (57.5)    | 5.1        |         | 2321 (56.5)                 | 108 (54.5)    | 4.5        |         |
| <b>Hospital admitted</b>        |                              |              |            |         |                             |               |            |         |
| <b>BPH</b>                      | 215 (30.3)                   | 3 (7.5)      | 1.4        | <0.001  | 795 (19.4)                  | 26 (13.1)     | 3.2        | <0.001  |
| <b>EVRMC</b>                    | 380 (53.6)                   | 32 (80.0)    | 7.8        |         | 2429 (59.1)                 | 148 (74.7)    | 5.7        |         |
| <b>ONP</b>                      | 88 (12.4)                    | 4 (10.0)     | 4.3        |         | 712 (17.3)                  | 15 (7.6)      | 2.1        |         |
| <b>RITM</b>                     | 26 (3.7)                     | 1 (2.5)      | 3.7        |         | 171 (4.2)                   | 9 (4.6)       | 5.0        |         |
| <b>Congenital abnormalities</b> |                              |              |            |         |                             |               |            |         |
| <b>Yes</b>                      | 8 (1.1)                      | 3 (2.5)      | 27.3       | 0.010   | 33 (0.8)                    | 9 (4.6)       | 6.2        | <0.001  |
| <b>No</b>                       | 691 (98.9)                   | 37 (92.5)    |            |         | 4035 (99.2)                 | 187 (95.4)    |            |         |
| <b>Missing</b>                  | 10                           | 0            |            |         | 39                          | 2             |            |         |
| <b>Height(h)-for-age</b>        |                              |              |            |         |                             |               |            |         |
| <b>-2SD ≤ h&lt;2SD</b>          | 251 (59.1)                   | 5 (45.5)     | 2.0        | 0.350   | 1213 (53.9)                 | 33 (48.5)     | 2.6        | 0.320   |
| <b>-3SD ≤ h&lt;-2SD</b>         | 63 (14.8)                    | 1 (9.1)      | 1.6        |         | 397 (17.6)                  | 10(14.7)      | 2.5        |         |
| <b>h&lt;-3SD</b>                | 111 (26.1)                   | 5 (45.5)     | 4.3        |         | 642 (28.5)                  | 25(36.8)      | 3.7        |         |
| <b>Missing</b>                  | 284                          | 29           |            |         | 1855                        | 130           |            |         |
| <b>Weight(w)-for-age</b>        |                              |              |            |         |                             |               |            |         |
| <b>-2SD ≤ w&lt;2SD</b>          | 511 (78.7)                   | 15 (44.1)    | 2.9        | <0.001  | 2424 (61.2)                 | 82 (43.3)     | 3.3        | <0.001  |
| <b>-3SD ≤ w&lt;-2SD</b>         | 86 (13.3)                    | 5 (14.7)     | 5.5        |         | 764 (19.3)                  | 36 (18.6)     | 4.5        |         |
| <b>w&lt;-3SD</b>                | 52 (8.0)                     | 14 (41.2)    | 21.2       |         | 776 (19.6)                  | 76 (39.2)     | 8.9        |         |

|                                                 |            |             |     |        |            |           |     |        |
|-------------------------------------------------|------------|-------------|-----|--------|------------|-----------|-----|--------|
| <b>Missing</b>                                  | 61         | 6           |     |        | 143        | 6         |     |        |
| <b>Duration of hospitalisation</b>              | 8 [6–9]    | 3.5 [1–8.2] |     | <0.001 | 4 [3–6]    | 1 [1–3]   |     | <0.001 |
| <b>Environmental factors*</b>                   |            |             |     |        |            |           |     |        |
|                                                 | n=184      | n=4         |     |        | n=904      | n=23      |     |        |
| <b>SES</b>                                      |            |             |     |        |            |           |     |        |
| <b>≤30</b>                                      | 83 (46.1)  | 3 (75.0)    | 3.5 | 0.560  | 504 (55.8) | 15 (65.2) | 2.9 | 0.490  |
| <b>&gt;30</b>                                   | 97 (53.9)  | 1 (25.0)    | 1.0 |        | 400 (44.2) | 8 (34.4)  | 2.0 |        |
| <b>Missing</b>                                  | 5          | 1           |     |        | 0          | 0         |     |        |
| <b>Past experience of child loss</b>            |            |             |     |        |            |           |     |        |
| <b>Yes</b>                                      | 15 (11.4)  | 0 (0.0)     | 0.0 | 1.000  | 71 (10.2)  | 7 (33.3)  | 9.0 | 0.003  |
| <b>No</b>                                       | 117 (88.6) | 2 (5.0)     | 1.7 |        | 626 (89.8) | 14 (66.7) | 2.2 |        |
| <b>Missing</b>                                  | 53         | 3           |     |        | 207        | 2         |     |        |
| <b>Number of siblings</b>                       |            |             |     |        |            |           |     |        |
| <b>&lt;2</b>                                    | 55 (29.7)  | 2 (50.0)    | 3.5 | 0.420  | 199 (22.1) | 3 (13.5)  | 1.5 | 0.050  |
| <b>2–3</b>                                      | 78 (42.2)  | 2 (50.0)    | 2.5 |        | 441 (48.9) | 8 (34.8)  | 1.8 |        |
| <b>≥4</b>                                       | 52 (28.1)  | 0 (0.0)     | 0.0 |        | 262 (29.0) | 12 (52.2) | 4.4 |        |
| <b>Missing</b>                                  | 0          | 1           |     |        | 2          | 0         |     |        |
| <b>Types of cooking fuel used</b>               |            |             |     |        |            |           |     |        |
| <b>Electricity, petroleum gas, and Kerosene</b> | 26 (14.1)  | 0           | 0.0 | 0.100  | 121 (12.8) | 2 (8.7)   | 1.7 | 0.780  |
| <b>Charcoal, and Wood</b>                       | 158 (85.9) | 4 (100.0)   | 2.5 |        | 775 (86.5) | 21 (91.3) | 2.6 |        |
| <b>Missing</b>                                  | 1          | 1           |     |        | 8          | 23        |     |        |

NOTE: n (%), number and percent of child unless stated otherwise. CFR, case fatality rate (%); duration of hospitalisation is presented as median with IQR, interquartile range; h, height; w, weight; congenital abnormalities including Down syndrome and congenital heart disease; SES, socio-economic status; BPH, Biliran Provincial Hospital; EVRMC, Eastern Visayas Regional Medical Center; ONP, Ospital Ng Palawan. (\*)Analysis from February 2014 to March 2016. Past experience of child loss included all causes of death.
